# Supplementary material for: Peripheral Soluble Immune Checkpoint-Related Proteins Were Associated with Survival and Treatment Efficacy of Osteosarcoma Patients, a Cohort Study
Source: MDPI journal article supplement (doi:10.3390/cancers16091628), 2024-04-24
Supplement: s1 [file s1]

## Supplemental Materials

# Peripheral Soluble Immune Checkpoint-Related Proteins Were Associated with Survival and Treatment Efficacy of Osteosarcoma Patients, a Cohort Study

Binghao Li <sup>1,2,†</sup>, Qinchuan Wang <sup>3,4,5,\*†</sup>, Yihong Luo <sup>4,5</sup>, Sicong Wang <sup>4,5</sup>, Sai Pan <sup>4,5</sup>, Wenting Zhao <sup>4,5</sup>, Zhaoming Ye <sup>1,2</sup> and Xifeng Wu <sup>4,5,\*</sup>

<sup>1</sup> Department of Orthopedics, Second Affiliated Hospital, Zhejiang University School of Medicine, Hangzhou 310009, China; libinghao@zju.edu.cn (B.L.); yezhaoming@zju.edu.cn (Z.Y.)

<sup>2</sup> Clinical Research Center of Motor System Disease of Zhejiang Province, Hangzhou 310009, China

<sup>3</sup> Department of Surgical Oncology, Affiliated Sir Run Run Shaw Hospital, Zhejiang University School of Medicine, Hangzhou 310016, China

<sup>4</sup> Center for Biostatistics, Bioinformatics and Big Data, The Second Affiliated Hospital and School of Public Health, Zhejiang University School of Medicine, Hangzhou 310009, China; yihongluo@zju.edu.cn (Y.L.); wangsicong@zju.edu.cn (S.W.); ps@zju.edu.cn (S.P.); zwt376@zju.edu.cn (W.Z.)

<sup>5</sup> The Key Laboratory of Intelligent Preventive Medicine of Zhejiang Province, Hangzhou 310058, China

\* Correspondence: wangqinchuan@zju.edu.cn (Q.W.); xifengw@zju.edu.cn (X.W.); Tel.: +137-7746-8656 (Q.W.); +171-3248-0685 (X.W.)

† These authors contributed equally to this work.

## Supplemental Figures and Tables

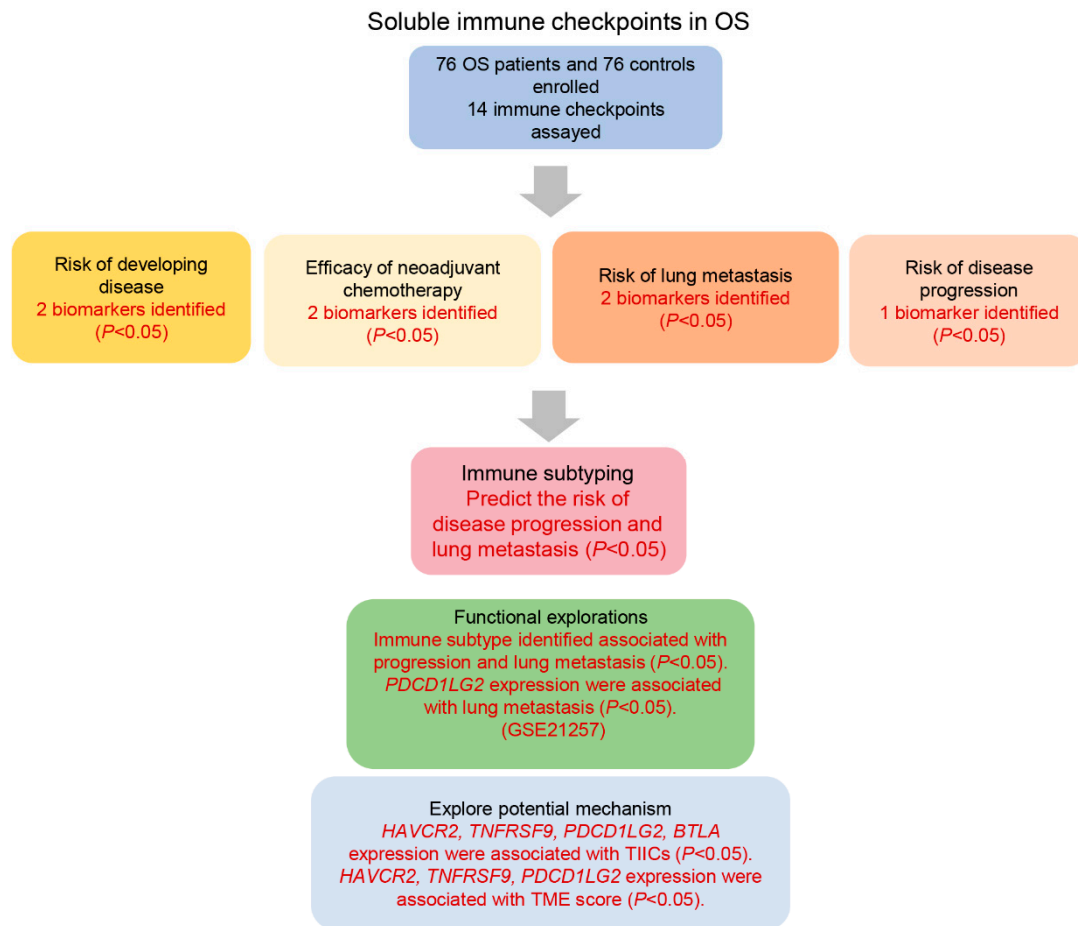

Supplemental Figure S1: A schematic design of the study.

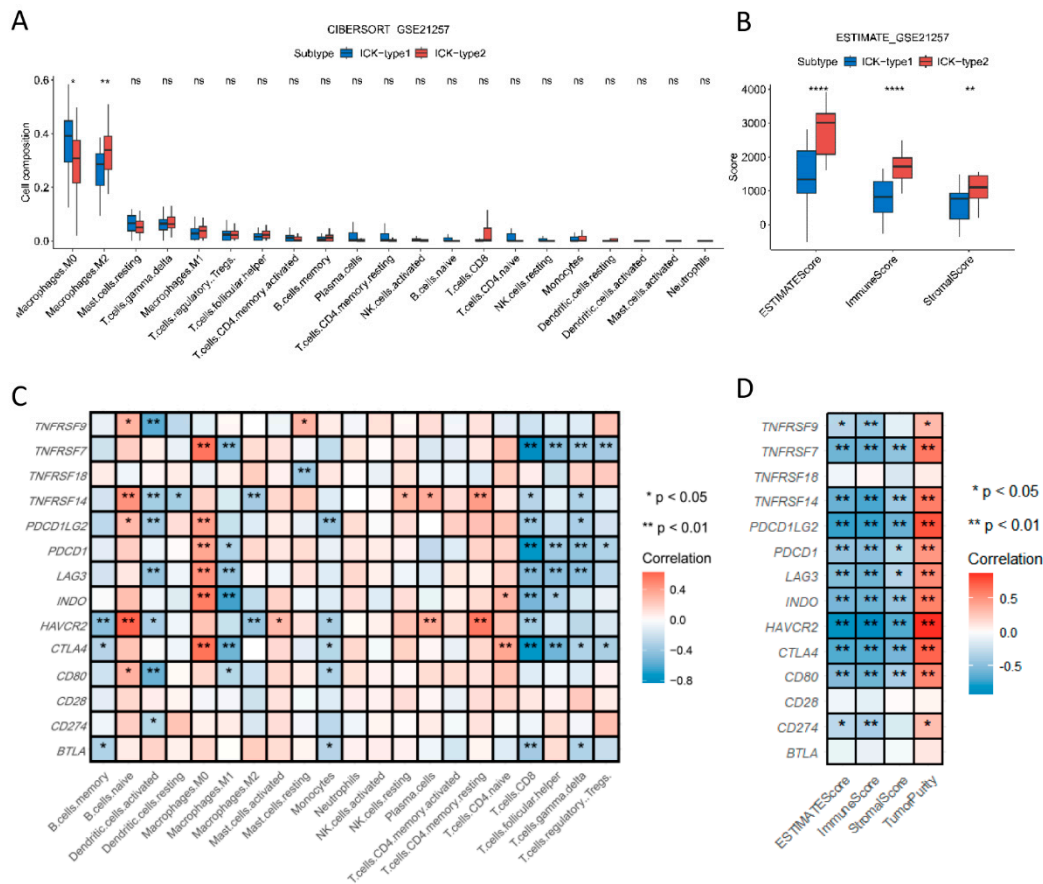

**Supplemental Figure S2: Immune landscape of osteosarcoma in dataset GSE21257.** (A) Assessment of Tumor-Infiltrating Immune Cells (TIICs) in the two immune subtypes. ns $\geq 0.05$ , \* $<0.05$ , \*\* $<0.01$ , \*\*\* $<0.001$ , \*\*\*\* $<0.0001$ . (B). The association of ICK immune subtypes and Tumor Microenvironment (TME) score. Patients in ICK-type2 had significantly higher proportion of M2 macrophages and lower proportion of M0 macrophages than the patients in ICK-type1 \* $<0.05$ , \*\* $<0.01$ . (C-D) The associations between individual ICK genes and TIIC TME scores were also performed.

## Supplemental Tables

**Supplemental Table S1. Lower limits of quantification (LLOQ) of each analyte (data from ThermoFisher†).**

| Analyte       | LLOQ (pg/ml) |
|---------------|--------------|
| BTLA          | 126.39       |
| CD27          | 4.83         |
| CD28          | 32.47        |
| CD80          | 41.82        |
| CD137 (4-1BB) | 15.14        |
| CD152 (CTLA4) | 8.57         |
| GITR          | 21.22        |
| HVEM          | 15.01        |
| IDO           | 3.66         |
| LAG-3         | 12.00        |
| PD-1          | 6.98         |
| PD-L1         | 3.49         |
| PD-L2         | 45.00        |
| TIM-3         | 59.59        |

† ProcartaPlex Human Immuno-Oncology Checkpoint Panel,

<https://www.thermofisher.com/order/catalog/product/EPX14A-15803-901>

**Supplemental Table S2. Peripheral levels of soluble immune checkpoint-related proteins in osteosarcoma patients and controls.**

| Marker | Osteosarcoma (n=76)        | Health control (n=76)      | <i>P</i>        |
|--------|----------------------------|----------------------------|-----------------|
|        | Median (IQR) pg/ml         | Median (IQR) pg/ml         |                 |
| sTIM3  | 477.80 [348.97, 646.44]    | 364.75 [197.56, 518.27]    | <b>1.86E-03</b> |
| sCD28* | 32.47 [32.47, 79.77]       | 32.47 [32.47, 43.92]       | -               |
| sCD137 | 55.25 [38.42, 79.57]       | 34.69 [15.98, 54.58]       | <b>4.80E-04</b> |
| sCD27  | 82.69 [40.20, 206.43]      | 62.84 [35.13, 106.82]      | 0.10            |
| sCTLA4 | 12.22 [8.86, 15.46]        | 13.68 [10.32, 22.04]       | <b>2.65E-02</b> |
| sIDO   | 23.48 [12.07, 33.42]       | 18.72 [12.00, 32.48]       | 0.66            |
| sLAG3  | 16.02 [12.00, 21.54]       | 13.95 [12.00, 28.24]       | 0.92            |
| sBTLA  | 326.16 [250.75, 537.74]    | 341.25 [254.25, 521.35]    | 0.99            |
| sCD80  | 43.22 [41.82, 86.72]       | 64.98 [41.82, 141.72]      | 0.05            |
| sPD1   | 37.54 [22.03, 52.12]       | 40.15 [26.61, 62.90]       | 0.16            |
| sPDL2  | 1995.28 [1237.72, 3052.60] | 2409.48 [1730.57, 3266.61] | <b>2.74E-02</b> |
| sHVEM* | 15.01 [15.01, 15.01]       | 15.01 [15.01, 15.01]       | -               |
| sPDL1* | 3.49 [3.49, 3.49]          | 3.49 [3.49, 3.49]          | -               |
| sGITR* | 21.22 [21.22, 21.22]       | 21.22 [21.22, 21.22]       | -               |

\*sHVEM, sPDL1, sGITR and sCD28 were not included in the subsequent analysis for minimal variations.

**Supplemental Table S3. Univariate Cox Hazards Model of lung metastasis and progression of osteosarcoma.**

| Markers                  | Lung Metastasis           |                | Progression             |                |
|--------------------------|---------------------------|----------------|-------------------------|----------------|
|                          | HR (95%CI)                | <i>P</i> value | HR (95%CI)              | <i>P</i> value |
| High vs low <sup>a</sup> |                           |                |                         |                |
| sTIM3                    | 1 (reference)             |                | 1 (reference)           |                |
|                          | 2.99 (0.66-13.5)          | 0.1555         | 3.22 (0.94-11.08)       | 0.0630         |
| sCD137                   | 1 (reference)             |                | 1 (reference)           |                |
|                          | 0.55 (0.15-2.01)          | 0.3689         | 0.65 (0.23-1.81)        | 0.4084         |
| sCD27                    | 1 (reference)             |                | 1 (reference)           |                |
|                          | 2.70 (0.88-8.27)          | 0.0816         | 2.01 (0.81-4.94)        | 0.1307         |
| sCTLA4                   | 1 (reference)             |                | 1 (reference)           |                |
|                          | 1.89 (0.62-5.79)          | 0.2665         | 0.99 (0.36-2.75)        | 0.9810         |
| sIDO                     | 1 (reference)             |                | 1 (reference)           |                |
|                          | 3.26 (0.90-11.85)         | 0.0727         | 2.18 (0.83-5.74)        | 0.1142         |
| sLAG3                    | 1 (reference)             |                | 1 (reference)           |                |
|                          | 0.44 (0.15-1.31)          | 0.1385         | 0.62 (0.25-1.54)        | 0.3068         |
| sBTLA                    | 1 (reference)             |                | 1 (reference)           |                |
|                          | <b>0.26 (0.09-0.77)</b>   | <b>0.0153</b>  | <b>0.36 (0.15-0.90)</b> | <b>0.0285</b>  |
| sCD80                    | 1 (reference)             |                | 1 (reference)           |                |
|                          | <b>0.21 (0.06-0.78)</b>   | <b>0.0196</b>  | 0.57 (0.23-1.42)        | 0.2278         |
| sPD1                     | 1 (reference)             |                | 1 (reference)           |                |
|                          | 0.35 (0.11-1.15)          | 0.0850         | <b>0.38 (0.14-0.99)</b> | <b>0.0482</b>  |
| sPDL2                    | 1 (reference)             |                | 1 (reference)           |                |
|                          | <b>12.08 (1.57-92.94)</b> | <b>0.0167</b>  | 2.68 (0.96-7.44)        | 0.0591         |

Abbreviations: HR Hazard ratio, CI Confidence interval. Significant values in bold font

<sup>a</sup>High and low level groups dichotomized by the R-package survminer

**Supplemental Table S4. Peripheral levels of soluble immune checkpoint-related proteins in osteosarcoma patients and controls. levels of soluble immune checkpoint-related proteins in different Huvos grade.**

| Marker | Huvos grade I (n=3)       | Huvos grade II-IV (n=56)   | <i>p</i>        |
|--------|---------------------------|----------------------------|-----------------|
|        | Median (IQR) pg/ml        | Median (IQR) pg/ml         |                 |
| sTIM3  | 195.86 [127.73, 273.73]   | 477.80 [348.97, 631.72]    | <b>3.40E-02</b> |
| sCD137 | 20.24 [17.69, 39.88]      | 53.84 [39.35, 80.76]       | 0.12            |
| sCD27  | 30.43 [23.45, 68.24]      | 94.75 [42.90, 226.16]      | 0.16            |
| sCTLA4 | 9.00 [8.78, 10.49]        | 12.96 [9.58, 16.39]        | 0.14            |
| sIDO   | 12.54 [8.10, 18.83]       | 24.23 [14.61, 36.98]       | 0.16            |
| sLAG3  | 14.42 [13.21, 24.52]      | 16.15 [12.00, 21.10]       | 0.97            |
| sBTLA  | 166.96 [148.63, 226.23]   | 312.04 [243.19, 509.71]    | 0.08            |
| sCD80  | 41.82 [41.82, 63.52]      | 41.82 [41.82, 79.25]       | 0.67            |
| sPD1   | 17.12 [12.05, 20.61]      | 38.61 [23.03, 51.85]       | <b>3.70E-02</b> |
| sPDL2  | 1110.37 [925.11, 1712.71] | 1828.17 [1304.77, 2666.77] | 0.28            |

**Supplemental Table S5. Clinical characteristics of immune subtypes in SAH.**

|                   |                     | sICK-type1<br>(n=35) | sICK-type2<br>(n=41) | <i>P</i> |
|-------------------|---------------------|----------------------|----------------------|----------|
| Gender(%)         |                     |                      |                      | 0.71     |
|                   | Male                | 27 (77.14)           | 29 (70.73)           |          |
|                   | Female              | 8 (22.86)            | 12 (29.27)           |          |
| Age(%)            |                     |                      |                      | 0.04     |
|                   | <18years            | 21 (60.00)           | 14 (34.15)           |          |
|                   | ≥ 18years           | 14 (40.00)           | 27 (65.85)           |          |
| Tumor size(%)     |                     |                      |                      | 0.31     |
|                   | <8cm                | 23 (65.71)           | 20 (48.78)           |          |
|                   | ≥ 8cm               | 12 (34.29)           | 19 (46.34)           |          |
|                   | Missing             | 0 (0.00)             | 2 (4.88)             |          |
| Tumor location(%) |                     |                      |                      | 1.00     |
|                   | Extremities         | 30 (85.71)           | 36 (87.80)           |          |
|                   | Non-extremities     | 5 (14.29)            | 5 (12.20)            |          |
| Huvos_grade (%)   |                     |                      |                      | 0.78     |
|                   | I and II            | 12 (34.29)           | 12 (29.27)           |          |
|                   | III and IV          | 15 (42.86)           | 20 (48.78)           |          |
|                   | Missing             | 8 (22.85)            | 9 (21.95)            |          |
| Metastasis (%)    |                     |                      |                      | 0.01     |
|                   | Non-metastasis      | 28 (80.00)           | 26 (63.41)           |          |
|                   | Baseline_metastasis | 6 (17.14)            | 3 (7.32)             |          |
|                   | followup_metastasis | 1 (2.86)             | 12 (29.27)           |          |
| Progression (%)   |                     |                      |                      | 0.01     |
|                   | No                  | 32 (91.43)           | 25 (60.98)           |          |
|                   | Yes                 | 3 (8.57)             | 16 (39.02)           |          |



**Supplemental Table S6. Clinical characteristics of immune subtypes in dataset of GSE21257**

|                    |                         | ICK-type1<br>(n=27) | ICK-type2<br>(n=26) | <i>P</i><br>value |
|--------------------|-------------------------|---------------------|---------------------|-------------------|
| Gender (%)         |                         |                     |                     | 0.918             |
|                    | Male                    | 18 (66.67)          | 16 (61.54)          |                   |
|                    | Female                  | 9 (33.33)           | 10 (38.46)          |                   |
| Age (%)            |                         |                     |                     | 0.918             |
|                    | <18years                | 18 (66.67)          | 16 (61.54)          |                   |
|                    | ≥ 18years               | 9 (33.33)           | 10 (38.46)          |                   |
| Histological (%)   |                         |                     |                     | 1.000             |
|                    | Osteoblastic            | 16 (59.26)          | 16 (61.54)          |                   |
|                    | Others                  | 11 (40.74)          | 10 (38.46)          |                   |
| Tumor location (%) |                         |                     |                     | 0.248             |
|                    | Extremities             | 20 (74.07)          | 24 (92.31)          |                   |
|                    | Non-extremities         | 6 (22.22)           | 2 (7.69)            |                   |
|                    | Missing                 | 1 (3.71)            | 0 (0.00)            |                   |
| Huvos grade (%)    |                         |                     |                     | 0.166             |
|                    | I and II                | 17 (62.96)          | 12 (46.15)          |                   |
|                    | III and IV              | 6 (22.22)           | 12 (46.15)          |                   |
|                    | Missing                 | 4 (14.82)           | 2 (7.70)            |                   |
| Metastasis (%)     |                         |                     |                     | 0.003             |
|                    | Non-metastasis          | 4 (14.81)           | 15 (57.69)          |                   |
|                    | Baseline metastasis     | 15 (55.56)          | 5 (19.23)           |                   |
|                    | Follow-up<br>metastasis | 8 (29.63)           | 6 (23.08)           |                   |
| Progression (%)    |                         |                     |                     | 0.009             |
|                    | No                      | 7 (25.93)           | 17 (65.38)          |                   |
|                    | Yes                     | 20 (74.07)          | 9 (34.62)           |                   |
